# Supplementary material
Source: publisher figshare collection journal article supplement (https://future-science-group.figshare.com/articles/dataset/_/22035134)

Electron Energy Loss Spectra of Silicon Dioxide of pSiNPs and within F-pSiNPs  
Measured by Cryo-EM

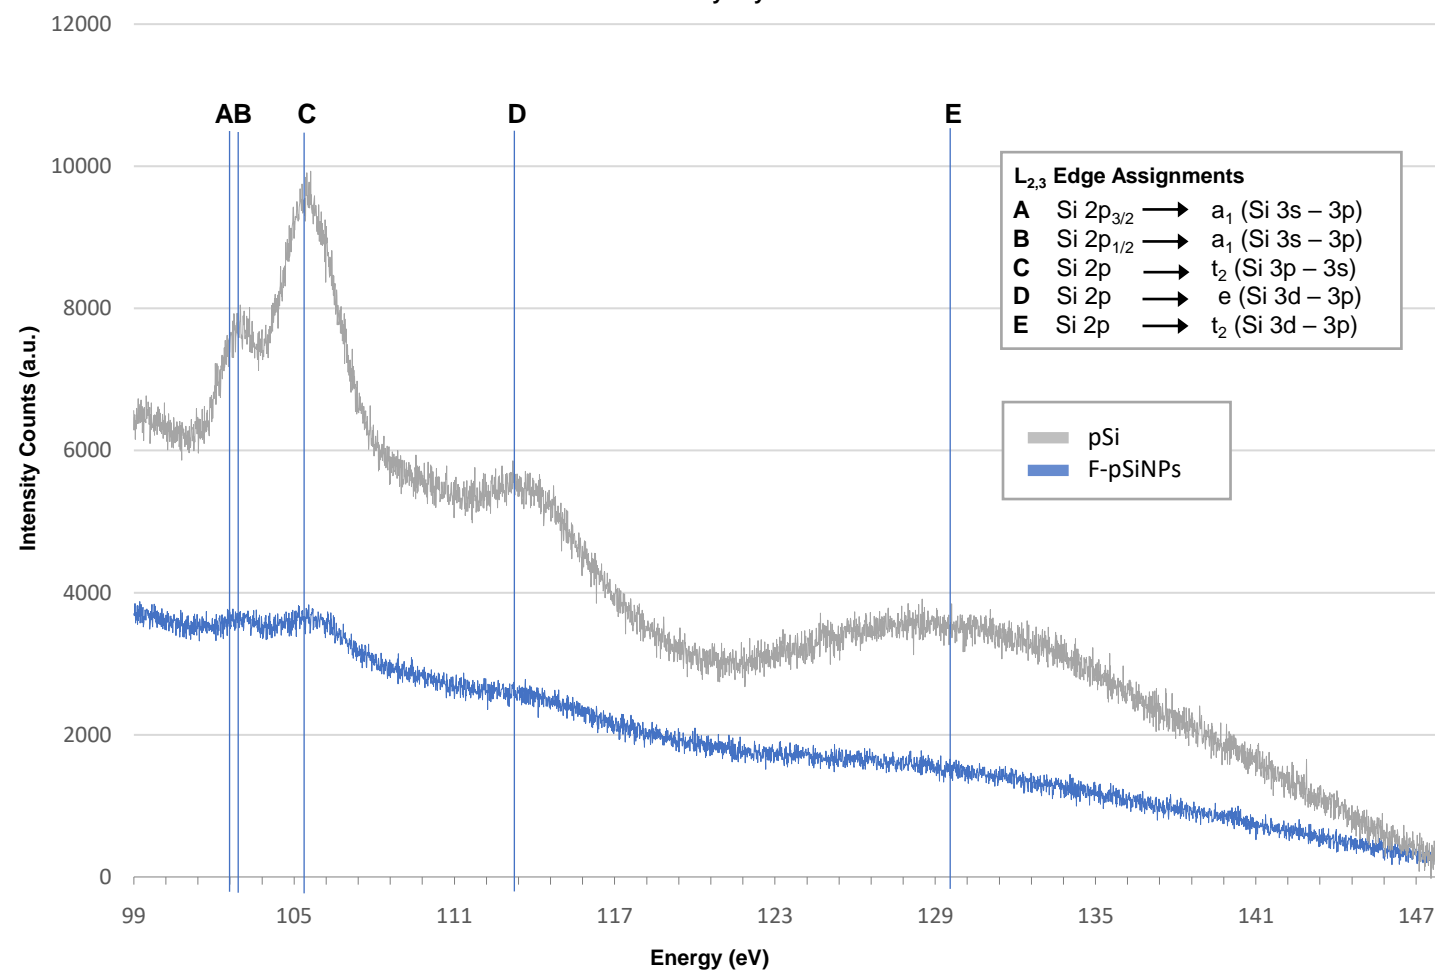

Supplement: Supplementary file 2 [file 1]
