# Supplementary material
Source: publisher figshare collection journal article supplement (https://future-science-group.figshare.com/articles/dataset/_/22035134)
Supplement: Supplementary file 3 [file 1]

A

|                 |       | p-Value* |        |            |
|-----------------|-------|----------|--------|------------|
| Light Intensity |       | Upper    | Lower  | Two-Tailed |
| Scotopic        | I+ND2 | 0.3617   | 0.6383 | 0.6408     |
| Scotopic        | I+ND1 | 0.3204   | 0.6796 | 0.7234     |
| Scotopic        | I     | 0.1682   | 0.8318 | 0.3364     |
| Photopic        | XVI   | 0.7038   | 0.2962 | 0.5923     |
| Flicker         | XVI   | 0.7675   | 0.2325 | 0.4651     |

\* T-Test Pooled  
Scotopic - dark adapted response  
Photopic - light adapted response  
ND - neutral density filter  
I - intensity of 1  
XVI - intensity of 16

B

Example of ERG Raw Data

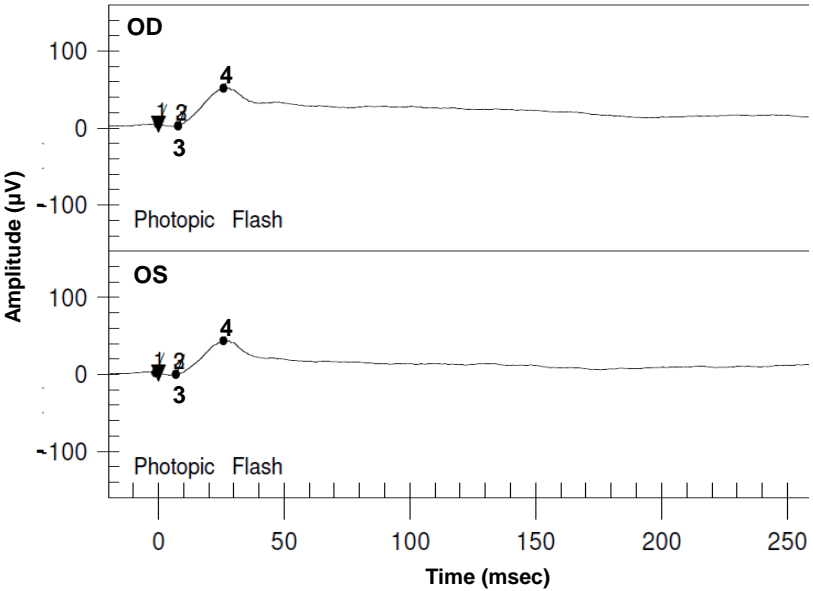

C

Example of an ERG Data Set

| b-Amplitude (µV) |     |         | Weeks Post-Treatment |       |      |       |
|------------------|-----|---------|----------------------|-------|------|-------|
| Photopic         |     |         |                      |       |      |       |
| Animal           | Eye | Treated | W2                   | W4    | W8   | W12   |
| 1                | OD  | +       | 81.0                 | 181.1 | 48.9 | 64.1  |
|                  | OS  | -       | 72.3                 | 188.0 | 43.6 | 72.9  |
| 2                | OD  | +       | 181.1                | 68.7  | 72.0 | 108.0 |
|                  | OS  | -       | 188.0                | 81.6  | 94.8 | 75.7  |
| 3                | OD  | +       | 57.1                 | 49.9  | 56.2 | 92.0  |
|                  | OS  | -       | 69.8                 | 51.7  | 90.5 | 109.2 |
| 4                | OD  | +       | 47.5                 | 38.5  | 72.4 | 75.6  |
|                  | OS  | -       | 65.5                 | 51.3  | 72.3 | 97.5  |

OD - right eye  
OS - left eye

Low Cut (Hz):  
High Cut (Hz):  
Background:

a-Wave Amplitude  
b-Wave Amplitude  
Cursor  
Cursor  
Difference:  
Cursor  
Cursor  
Difference:

| OD              |             | OS              |             |
|-----------------|-------------|-----------------|-------------|
| 0.3             |             | 0.3             |             |
| 500             |             | 500             |             |
| Med (30 cd m-2) |             | Med (30 cd m-2) |             |
| Amplitude (µV)  | Time (msec) | Amplitude (µV)  | Time (msec) |
| 5               | 0           | 1.7             | -1          |
| 2.8             | 8           | -0.1            | 7           |
| -2.2            | 8           | -1.8            | 8           |
| 2.8             | 8           | -0.1            | 7           |
| 51.7            | 26          | 43.5            | 26          |
| 48.9            | 18          | 43.6            | 19          |
