# Supplementary material
Source: publisher figshare collection journal article supplement (https://future-science-group.figshare.com/articles/dataset/_/22035134)

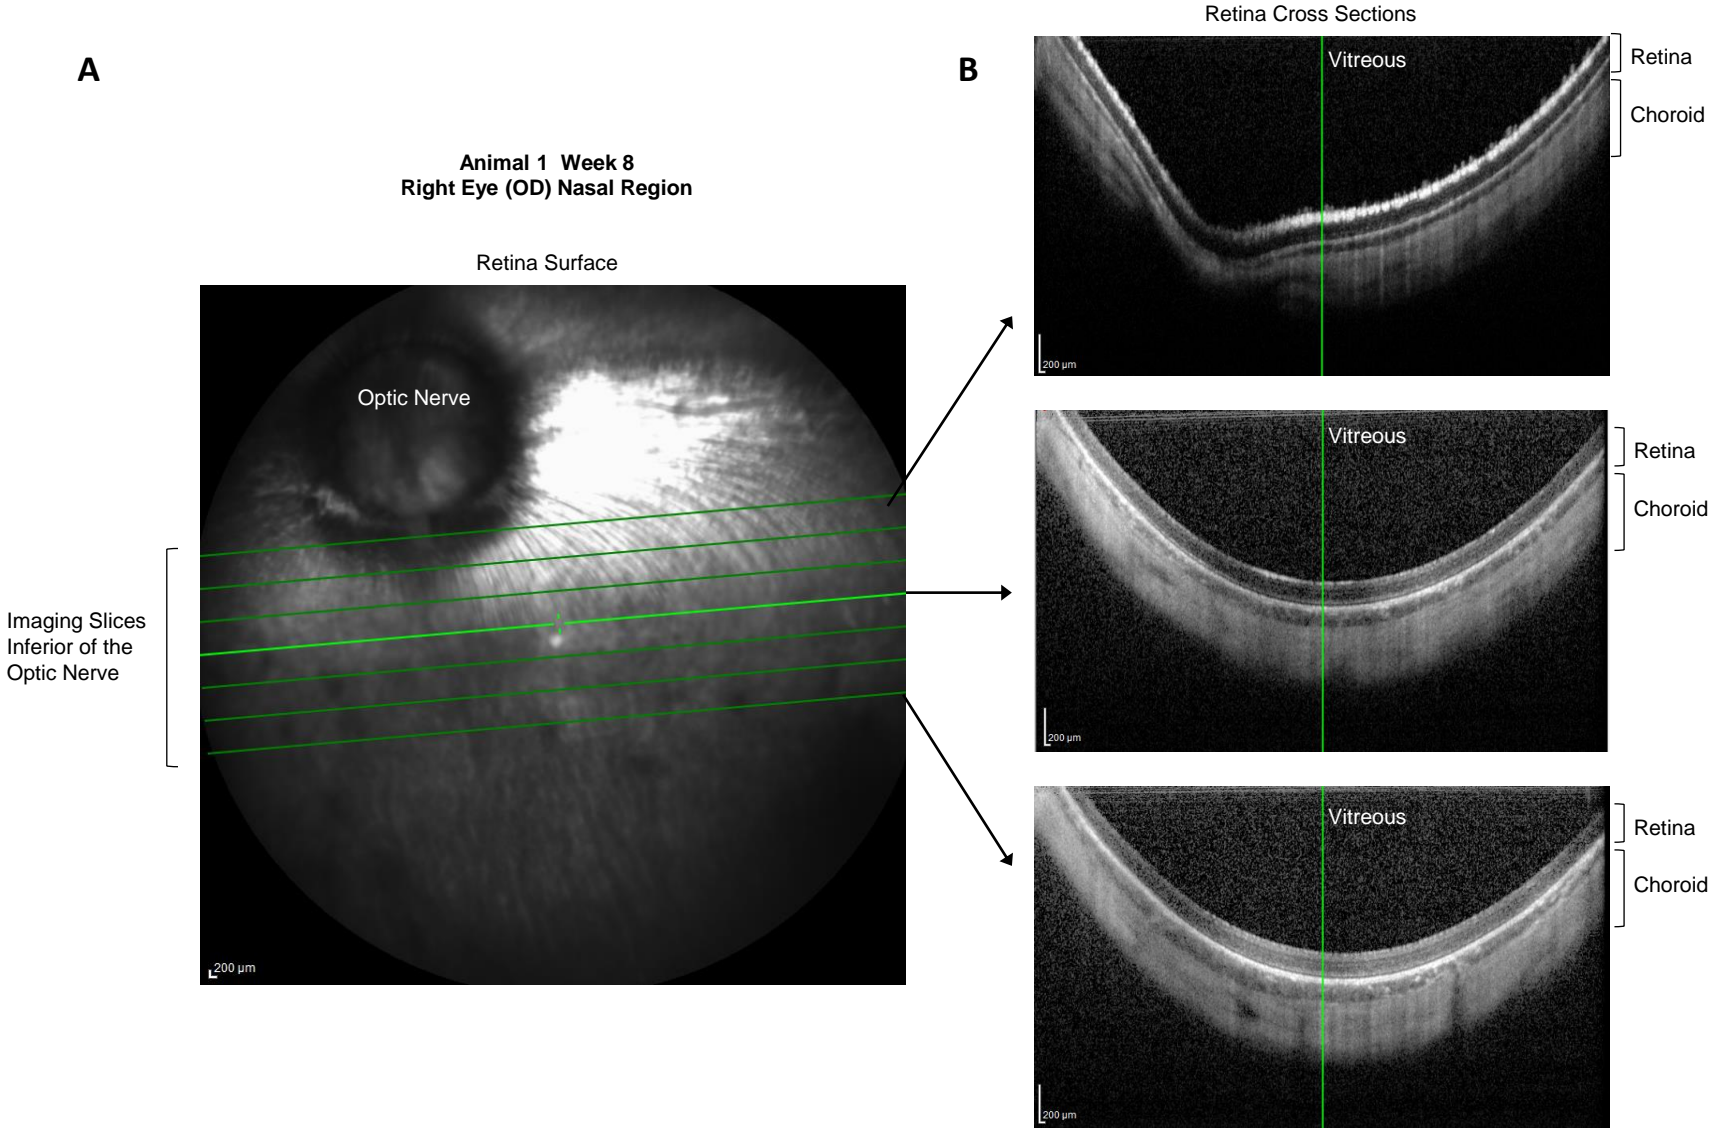

Supplement: Supplementary file 1 [file 1]

Right eye (OD) (disease)

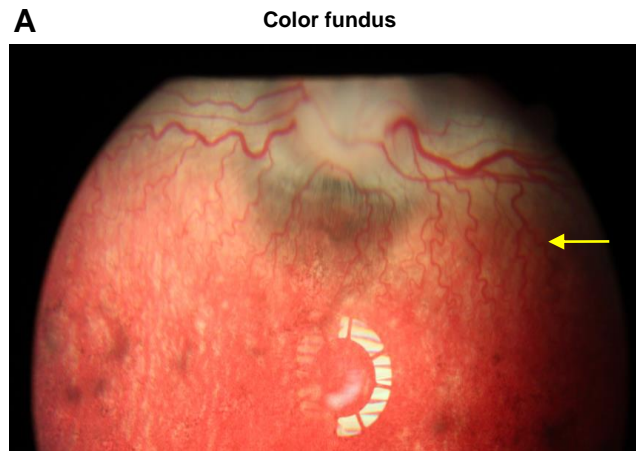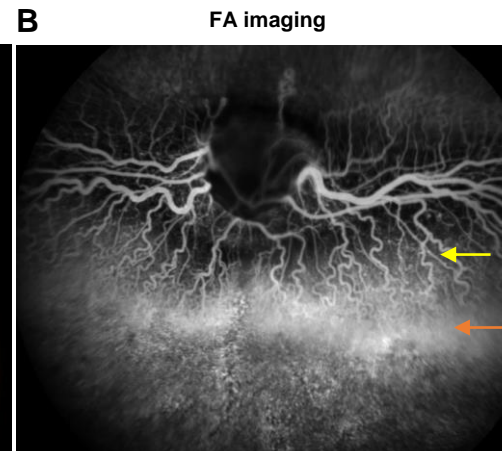

Left eye (OS) (sham)

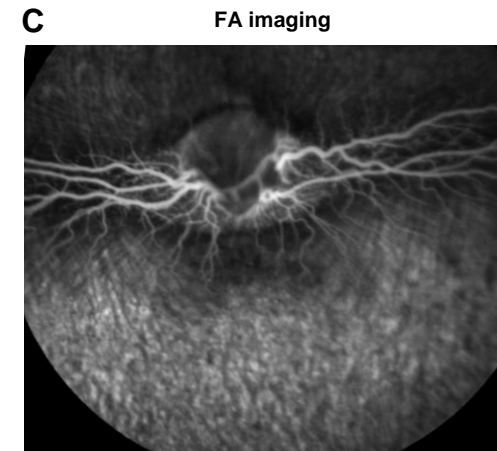

Supplement: Supplementary file 4 [file 1]

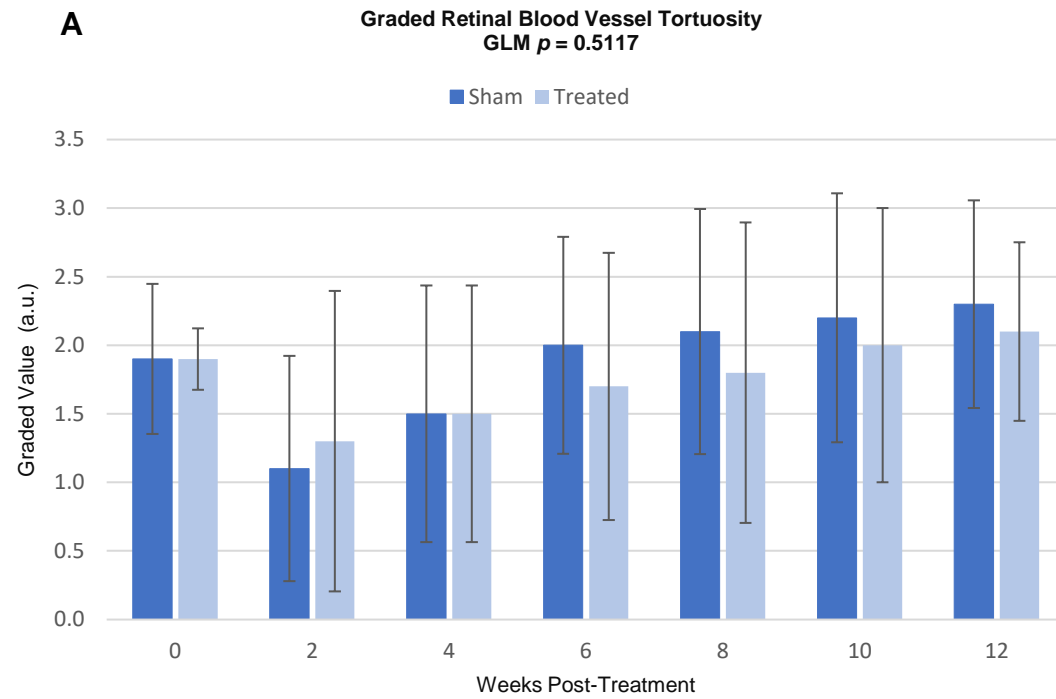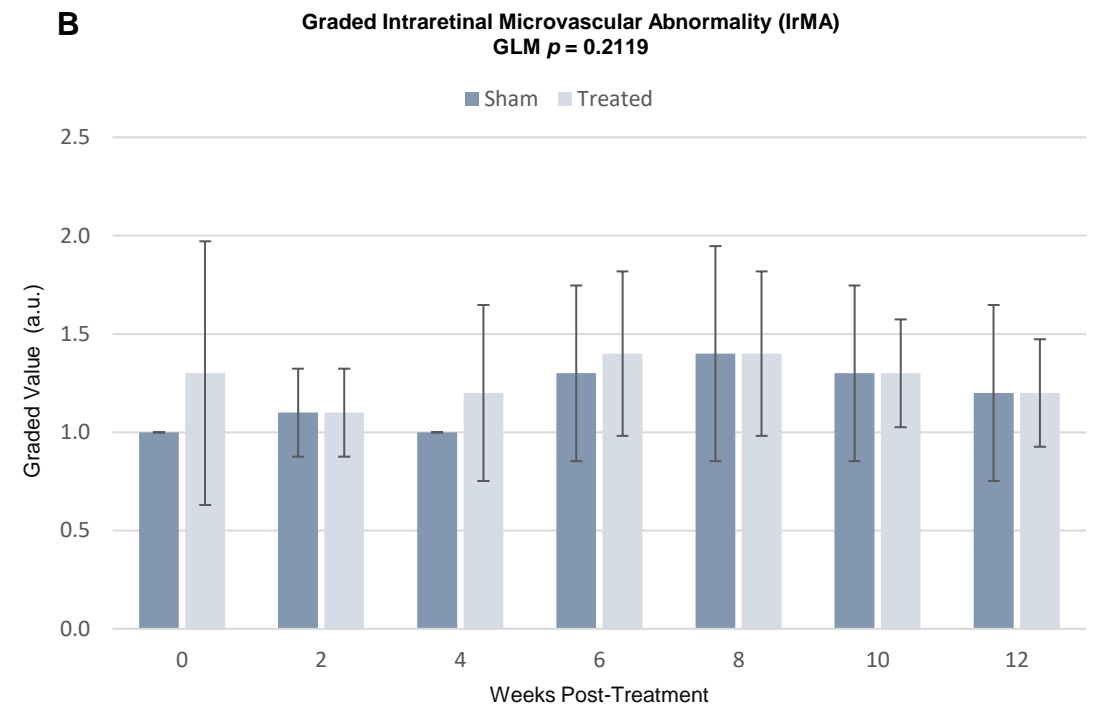

Supplement: Supplementary file 5 [file 1]

**A**

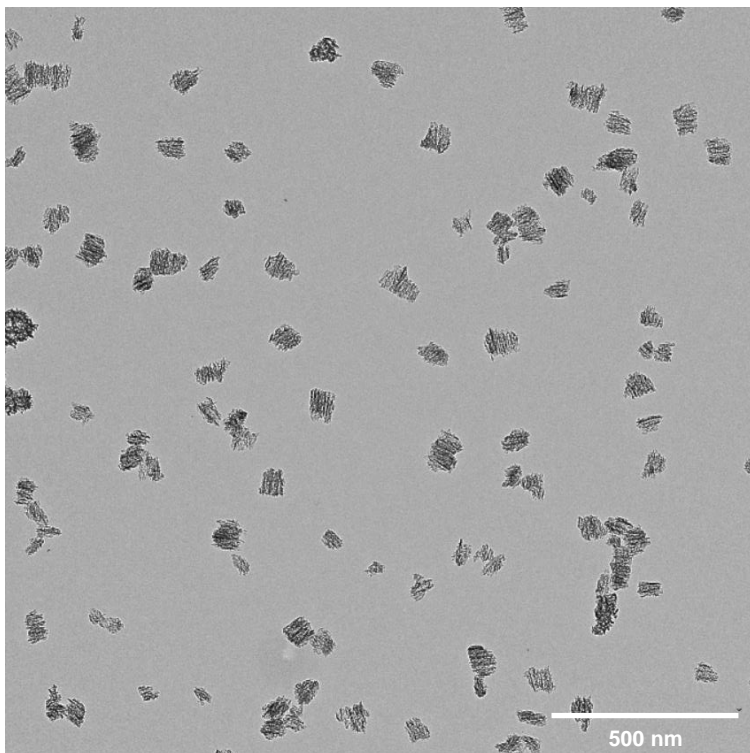

**B**

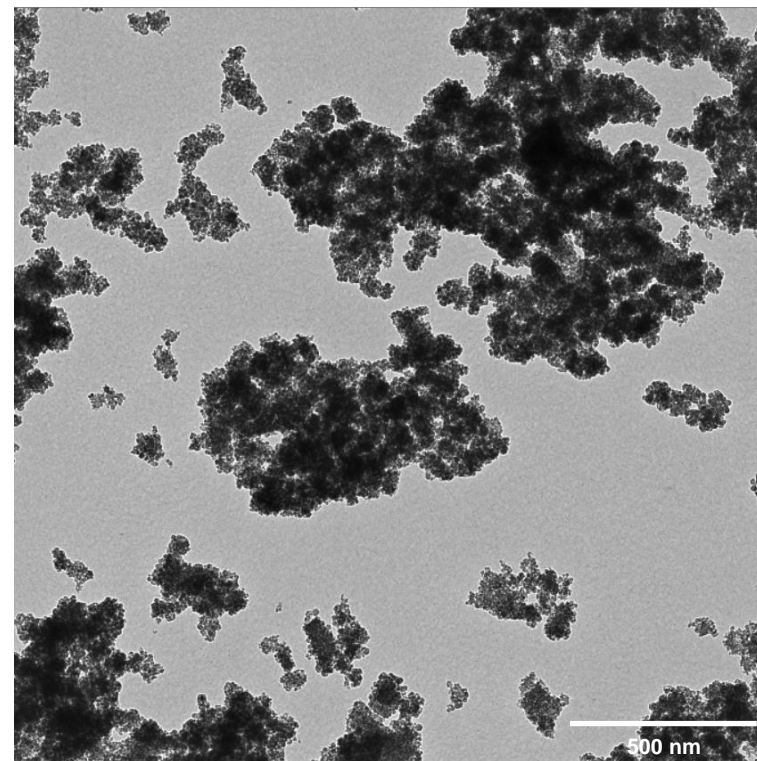

Supplement: Supplementary file 6 [file 1]
